# Supplementary material
Source: PubMed Central journal article supplement (PMC8577372)
Supplement: jvi.01323-21-s0001.pdf [file jvi.01323-21-s0001.pdf]

**Supplementary Information  
(Figures and Tables)**

**Natural Occurring Polymorphisms in HIV-1  
Integrase and RNase H Regulate Virus Release and  
Autoprocessing**

T. Imamichi, JG. Bernbaum, S. Laverdure, et al.,

Supplemental Fig. S1. Comparison of HIV replication activity between HIV(WT) and mutants

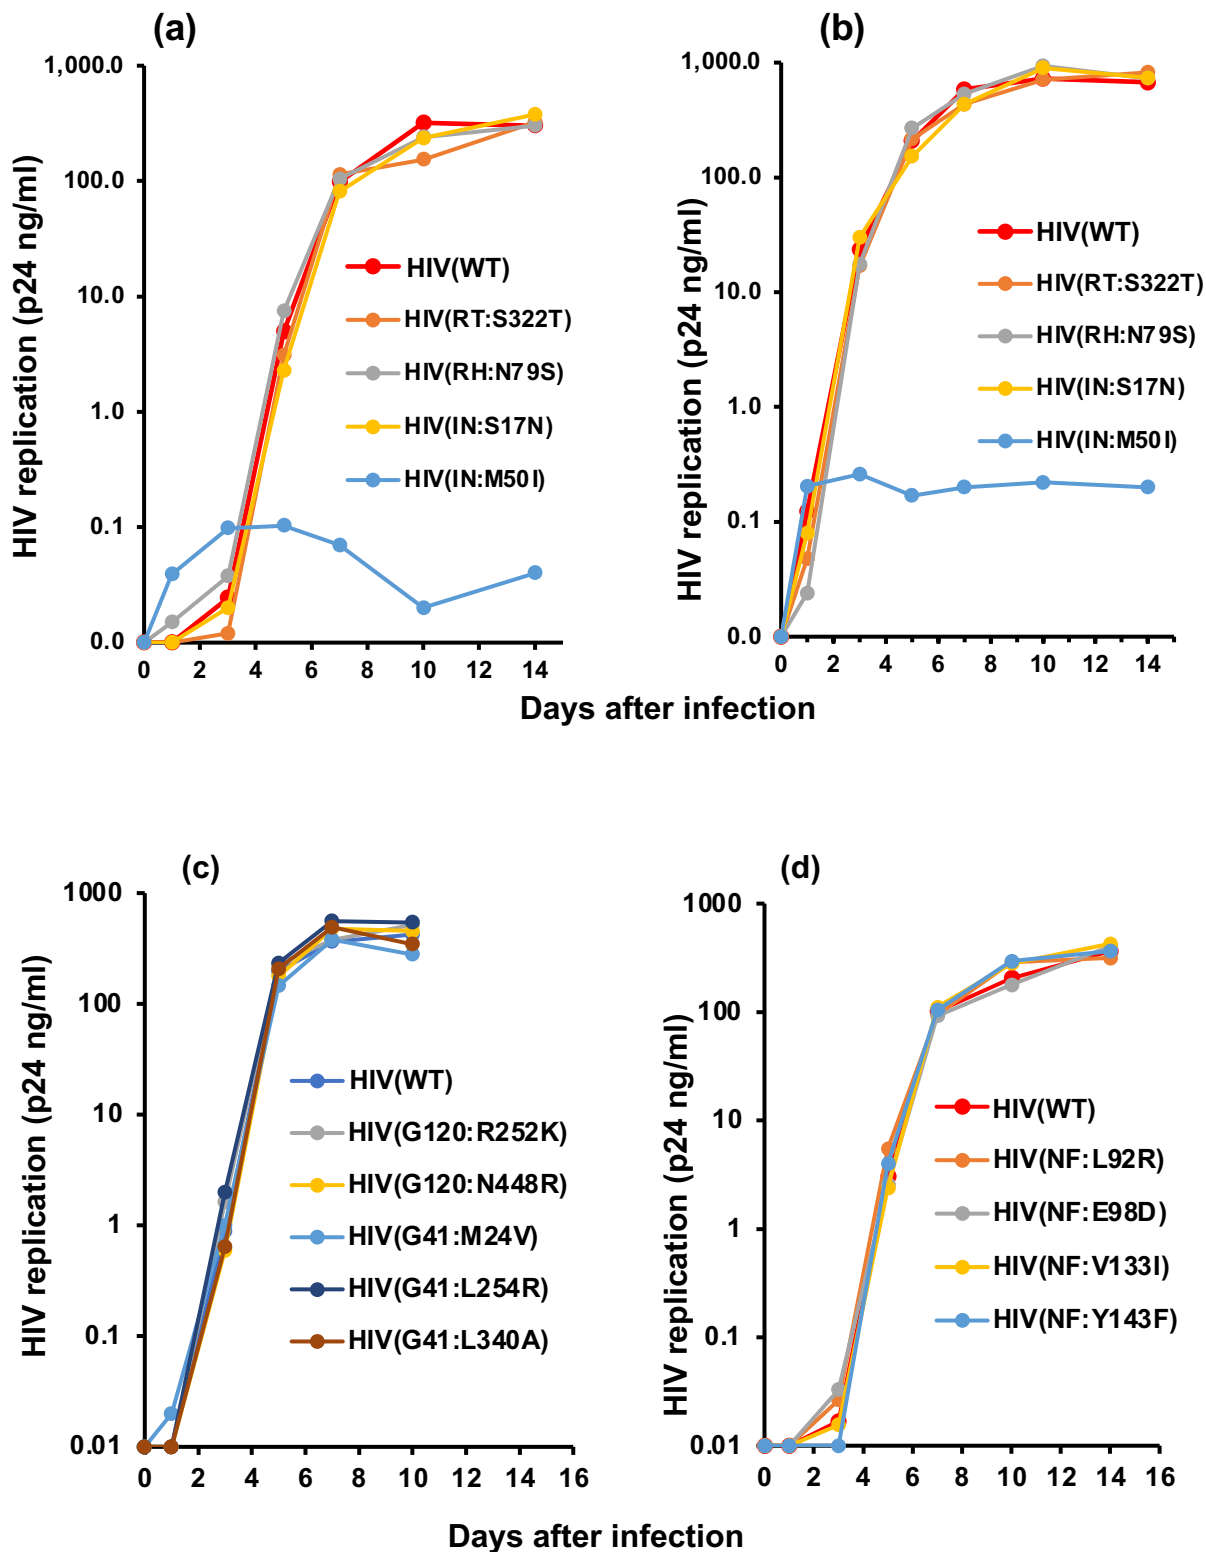

PHA-stimulated primary CD4 T cells from normal healthy donor were infected with HIV(WT) or variants containing mutation in GagPol as described in the materials and methods. The infected cells were cultured for 14 days with changing media on every 3-4 days. HIV replication was monitored using a p24 antigen capture kit. Data indicates means  $\pm$  SD.

**Supplemental Fig. S2, Predicted structure analysis of IN protein.**

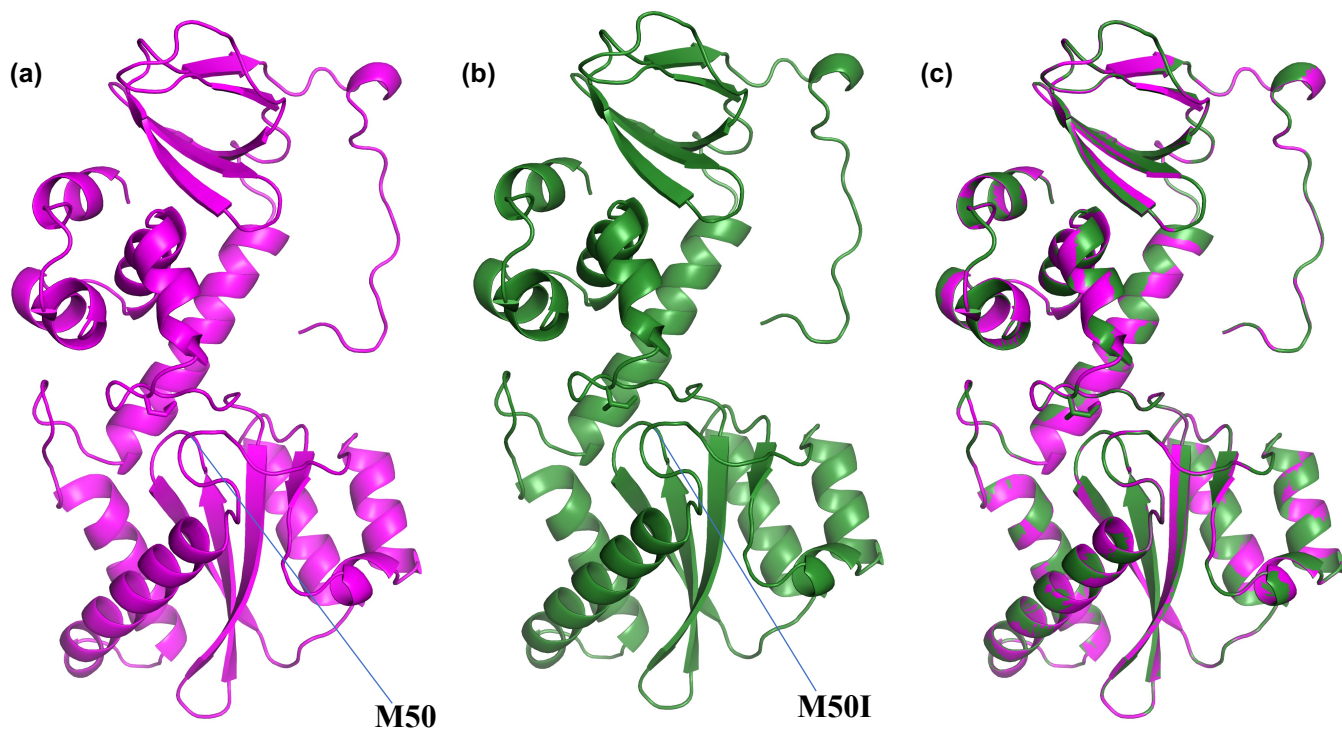

(a and b) *In Silico*, full-length IN structures were created as described in the materials and methods. (c) Alignment of homology models from Robetta between IN:WT (magenta) and IN:M50I (forest). The side chains in positions IN:50 are shown in lines.

**Supplemental Fig. S3, Anti-PR antibody detects 67kDa band in HIV(M50I) lysate**

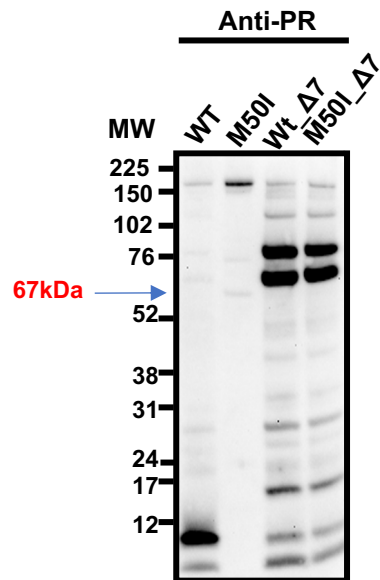

Virus particles were isolated from transfection sup using ultracentrifugation as described in the Materials and Methods, and 5  $\mu$ g/ml of total viral proteins were subjected to WB. PR fragments were detected by polyclonal anti-PR antibody. Near 67kDa band is detected in M50I lysate.

Supplemental Fig. S4: Impact of RH:N79S and IN:N79S on HIV(INM50I) replication

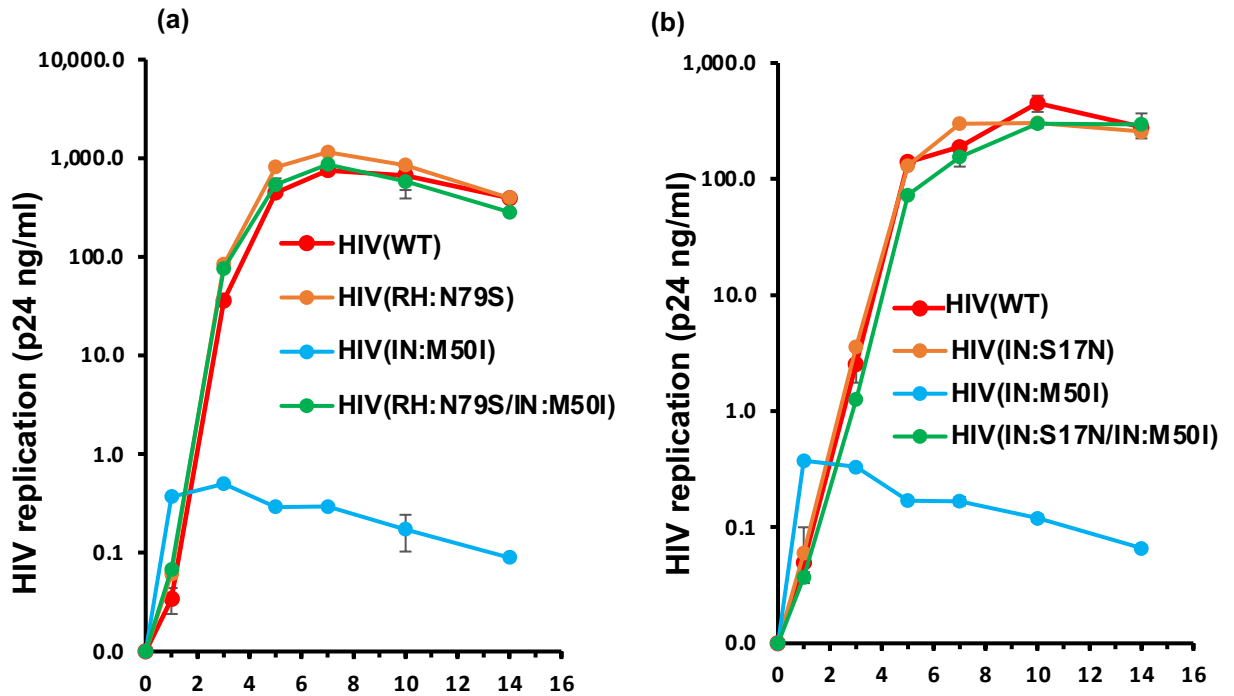

PHA-stimulated primary CD4 T cells from a normal healthy donor were infected with HIV(WT), HIV(RH:N79S), HIV(IN:M50I), HIV(RH:N79S/IN:M50I), HIV(IN:S17N) or HIV(IN:S17N/M50I) as described in the Materials and Methods. The infected cells were cultured for 14 days with changing media on every 3-4 days. HIV replication was monitored using a p24 antigen capture kit. Data indicates means  $\pm$  SD.

## Supplemental Table S1: p24 antigen concentration in HIV stocks

| Denoted HIV         | p24 $\mu\text{g/ml}$ * (%)    |
|---------------------|-------------------------------|
| HIV(Wt)             | 89 $\pm$ 12 (n=7) (100)       |
| HIV(RT:S322T)       | 71 (n=2)                      |
| HIV(RH:N79S)        | 59 (n=2)                      |
| HIV(IN:S17N)        | 84 $\pm$ 14 (n=2) (94)        |
| HIV(IN:M50I)        | 0.30 $\pm$ 0.087 (n=7) (0.34) |
| HIV(G120:R252K)     | 79 (n=2)                      |
| HIV(G120:N448R)     | 122 (n=2)                     |
| HIV(G41:M24V)       | 83 (n=2)                      |
| HIV(G41:M24L)       | 85 (n=2)                      |
| HIV(G41:L254R)      | 157 (n=2)                     |
| HIV(G41:L340A)      | 105 (n=2)                     |
| HIV(NF:K92R)        | 128 (n=2)                     |
| HIV(NF:E98D)        | 99 (n=2)                      |
| HIV(NF:V133I)       | 79 (n=2)                      |
| HIV(NF:Y143F)       | 122 (n=2)                     |
| HIV(IN:S17N/M50I)   | 160 (n=2)                     |
| HIV(RH:N79S/M50I)   | 136 $\pm$ 28 (n=3)            |
| HIV(WT) from HeLa   | 296 (n=2) (100)               |
| HIV(M50I) from HeLa | 0.825 (n=2) (0.3)             |

\* Transfection supernatants from HEK293T cells or HeLa were collected and viral particles were pelleted using ultracentrifugation at 100,000 xg as described in the Materials and Methods.

Each viral pellet was resuspended in 1/100 volume of the transfection supernatants in complete culture media. Viral concentration was determined by measuring HIV p24 antigen by ELISA.

## Supplemental Table S2: Population analysis of amino acid (aa) residue at Codon 50 in IN and Codon 79 in RH

|                      |     | aa at Codon 50 in IN |                   |      |      |    |    |    | Grand Total    |      |
|----------------------|-----|----------------------|-------------------|------|------|----|----|----|----------------|------|
|                      |     | Del *                | I                 | L    | M    | R  | T  | V  |                | ?    |
| aa at Codon 79 in RH | Del |                      |                   |      | 2 ** |    |    |    |                | 2    |
|                      | C   |                      |                   |      | 5    |    |    |    |                | 5    |
|                      | D   |                      |                   |      | 2    |    |    |    |                | 2    |
|                      | G   |                      | 2                 |      | 4    |    |    |    |                | 6    |
|                      | H   |                      |                   |      | 1    |    |    |    |                | 1    |
|                      | M   |                      |                   |      | 1    |    |    |    |                | 1    |
|                      | N   | 1                    | 203               | 5    | 1441 | 3  | 14 | 1  | 9              | 1677 |
|                      | R   |                      | 1                 |      | 2    |    |    |    |                | 3    |
|                      | S   |                      | 194 ***<br>(3.8%) | 11   | 3128 | 7  | 21 | 6  | 12             | 3379 |
|                      | T   |                      |                   |      | 8    |    |    |    |                | 8    |
|                      | ?   |                      | 1                 |      | 13   |    | 1  |    | 1              | 16   |
| Grand Total          | 1   | 401                  | 16                | 4607 | 10   | 36 | 7  | 22 | 5100<br>(100%) |      |

\*: "Del " and " ? " indicate "deletion of the codon" and " unsure aa", respectively. I: Ile, L: leu,

M: Met, R: Arg, T: Thr, V: Val, C: Cys, D: Asp, G: Gly, H: His, N: Asn, S: Ser.

Yellow font letters show aa of the subtype B sequence at each codon.

Green letters show mutations of the interest.

\*\* : Number of clinical isolate containing the sequence.

\*\*\* : Number of clinical isolates containing a combination of IN:M50I and RH:N79S mutations.

The numbers in the parentheses indicates the percentages of population in a total 5100 sequence data.

### Supplemental Table S3: Population analysis of amino acid (aa) residues at Codons 17 and 50 and in IN

|                      |             | aa at Codon 50 in IN |                  |    |      |    |    |   |    |               |
|----------------------|-------------|----------------------|------------------|----|------|----|----|---|----|---------------|
|                      |             | Del *                | I                | L  | M    | R  | T  | V | ?  | Grand Total   |
| aa at Codon 17 in IN | Del         |                      |                  |    | 1 ** |    |    |   |    | 1             |
|                      | C           |                      | 7                |    | 60   | 1  |    |   |    | 68            |
|                      | G           |                      | 1                |    |      |    |    |   |    | 1             |
|                      | N           | 1                    | 58 ***<br>(1.1%) | 4  | 822  |    | 10 |   | 5  | 900           |
|                      | R           |                      | 1                |    |      |    |    |   |    | 1             |
|                      | S           |                      | 323              | 11 | 3607 | 9  | 24 | 6 | 15 | 3995          |
|                      | T           |                      | 9                | 1  | 106  |    | 2  | 1 | 1  | 120           |
|                      | ?           |                      | 2                |    | 11   |    |    |   | 1  | 14            |
|                      | Grand Total | 1                    | 401              | 16 | 4607 | 10 | 36 | 7 | 22 | 5100<br>(100) |

\*: "Del" and "?" indicate "deletion of the codon" and "unsure aa", respectively.

I: Ile, L: leu, M: Met, R: Arg, T: Thr, V: Val, C: Cys, G: Gly, N: Asn, R: Arg, S: Ser, T; Thr.

Yellow font letters show aa of the subtype B sequence at each codon.

Green letters show mutations of the interest.

\*\* : Number of clinical isolates containing the sequence.

\*\*\*: Numbers of clinical isolates containing a combination of IN:M50I and IN:S17N mutation.

The numbers in the parentheses indicates the percentages of population in a total 5100 sequence data.



## Supplemental Table S4: Population analysis of IN:M50I in CRF

| IN codon50        |                     |                      |                    |             |  |                   |                     |                      |                    |             |
|-------------------|---------------------|----------------------|--------------------|-------------|--|-------------------|---------------------|----------------------|--------------------|-------------|
| CRFs <sup>1</sup> | IN:M50 <sup>2</sup> | IN:M50I <sup>3</sup> | Total <sup>4</sup> | %of IN:M50I |  | CRFs <sup>1</sup> | IN:M50 <sup>2</sup> | IN:M50I <sup>3</sup> | Total <sup>4</sup> | %of IN:M50I |
| 01_AE             | 1991                | 90                   | 2115               | 4.26%       |  | 58_01B            | 6                   | 0                    | 6                  | 0.00%       |
| 02_AG             | 501                 | 35                   | 592                | 5.91%       |  | 59_01B            | 8                   | 0                    | 8                  | 0.00%       |
| 03_AB             | 6                   | 0                    | 6                  | 0.00%       |  | 60_BC             | 2                   | 0                    | 6                  | 0.00%       |
| 04_cpx            | 8                   | 0                    | 8                  | 0.00%       |  | 61_BC             | 2                   | 0                    | 3                  | 0.00%       |
| 05_DF             | 3                   | 0                    | 4                  | 0.00%       |  | 62_BC             | 3                   | 0                    | 3                  | 0.00%       |
| 06_cpx            | 121                 | 7                    | 129                | 5.43%       |  | 63_02A            | 15                  | 116                  | 175                | 66.29%      |
| 07_BC             | 398                 | 12                   | 411                | 2.92%       |  | 64_BC             | 8                   | 0                    | 8                  | 0.00%       |
| 08_BC             | 309                 | 14                   | 331                | 4.23%       |  | 65_cpx            | 7                   | 0                    | 7                  | 0.00%       |
| 09_cpx            | 5                   | 0                    | 6                  | 0.00%       |  | 66_BF1            | 2                   | 1                    | 3                  | 33.33%      |
| 10_CD             |                     | 0                    | 3                  | 0.00%       |  | 67_01B            | 1                   | 0                    | 2                  | 0.00%       |
| 11_cpx            | 21                  | 7                    | 30                 | 23.33%      |  | 68_01B            | 4                   | 0                    | 4                  | 0.00%       |
| 12_BF             | 15                  | 0                    | 16                 | 0.00%       |  | 69_01B            | 7                   | 0                    | 7                  | 0.00%       |
| 13_cpx            | 22                  | 2                    | 27                 | 7.41%       |  | 70_BF1            | 3                   | 0                    | 3                  | 0.00%       |
| 14_BG             | 15                  | 0                    | 15                 | 0.00%       |  | 71_BF1            | 11                  | 3                    | 14                 | 21.43%      |
| 15_01B            | 8                   | 0                    | 8                  | 0.00%       |  | 72_BF1            | 5                   | 0                    | 5                  | 0.00%       |
| 16_A2D            | 2                   | 2                    | 4                  | 50.00%      |  | 73_BG             | 3                   | 0                    | 3                  | 0.00%       |
| 17_BF             | 7                   | 0                    | 7                  | 0.00%       |  | 74_01B            | 3                   | 0                    | 3                  | 0.00%       |
| 18_cpx            | 11                  | 0                    | 11                 | 0.00%       |  | 75_BF             | 3                   | 0                    | 3                  | 0.00%       |
| 19_cpx            | 5                   | 1                    | 6                  | 16.67%      |  | 76_01B            | 2                   | 0                    | 2                  | 0.00%       |
| 20_BG             | 5                   | 0                    | 5                  | 0.00%       |  | 77_cpx            | 4                   | 0                    | 4                  | 0.00%       |
| 21_A2D            | 3                   | 0                    | 3                  | 0.00%       |  | 78_cpx            | 2                   | 1                    | 3                  | 33.33%      |
| 22_01A1           | 3                   | 20                   | 27                 | 74.07%      |  | 79_0107           | 3                   | 0                    | 3                  | 0.00%       |
| 23_BG             | 2                   | 0                    | 2                  | 0.00%       |  | 80_0107           | 3                   | 0                    | 3                  | 0.00%       |
| 24_BG             | 7                   | 1                    | 9                  | 11.11%      |  | 81_cpx            | 2                   | 0                    | 2                  | 0.00%       |
| 25_cpx            | 2                   | 1                    | 6                  | 16.67%      |  | 82_cpx            | 6                   | 0                    | 6                  | 0.00%       |
| 26_A5U            | 1                   | 3                    | 4                  | 75.00%      |  | 83_cpx            | 10                  | 0                    | 11                 | 0.00%       |
| 27_cpx            | 3                   | 1                    | 4                  | 25.00%      |  | 84_A1D            | 0                   | 0                    | 3                  | 0.00%       |
| 28_BF             | 5                   | 0                    | 5                  | 0.00%       |  | 85_BC             | 10                  | 0                    | 11                 | 0.00%       |
| 29_BF             | 8                   | 0                    | 8                  | 0.00%       |  | 86_BC             | 3                   | 0                    | 3                  | 0.00%       |
| 31_BC             | 0                   | 0                    | 3                  | 0.00%       |  | 87_cpx            | 3                   | 0                    | 3                  | 0.00%       |
| 32_06A6           | 3                   | 0                    | 4                  | 0.00%       |  | 88_BC             | 3                   | 0                    | 3                  | 0.00%       |
| 33_01B            | 7                   | 0                    | 7                  | 0.00%       |  | 89_BF             | 8                   | 0                    | 8                  | 0.00%       |
| 34_01B            | 3                   | 0                    | 3                  | 0.00%       |  | 90_BF1            | 6                   | 3                    | 9                  | 33.33%      |
| 35_AD             | 22                  | 0                    | 23                 | 0.00%       |  | 92_C2U            | 5                   | 0                    | 5                  | 0.00%       |
| 36_cpx            | 4                   | 0                    | 4                  | 0.00%       |  | 93_cpx            | 2                   | 0                    | 3                  | 0.00%       |
| 37_cpx            | 13                  | 0                    | 13                 | 0.00%       |  | 95_02B            | 5                   | 0                    | 5                  | 0.00%       |
| 38_BF             | 1                   | 0                    | 1                  | 0.00%       |  | 96_cpx            | 3                   | 0                    | 3                  | 0.00%       |
| 39_BF             | 2                   | 1                    | 3                  | 33.33%      |  | 97_01B            | 5                   | 0                    | 5                  | 0.00%       |
| 40_BF             | 3                   | 0                    | 4                  | 0.00%       |  | 98_06B            | 1                   | 0                    | 1                  | 0.00%       |
| 41_CD             | 0                   | 0                    | 3                  | 0.00%       |  | 99_BF             | 3                   | 0                    | 3                  | 0.00%       |
| 42_BF             | 14                  | 2                    | 17                 | 11.76%      |  | 100_01C           | 3                   | 0                    | 3                  | 0.00%       |
| 43_02G            | 5                   | 0                    | 5                  | 0.00%       |  | 101_01B           | 3                   | 0                    | 3                  | 0.00%       |
| 44_BF             | 2                   | 1                    | 3                  | 33.33%      |  | 102_0107          | 2                   | 0                    | 2                  | 0.00%       |
| 45_cpx            | 7                   | 1                    | 8                  | 12.50%      |  | 103_01B           | 4                   | 0                    | 4                  | 0.00%       |
| 46_BF             | 8                   | 0                    | 8                  | 0.00%       |  | 104_0107          | 3                   | 0                    | 3                  | 0.00%       |
| 47_BF             | 3                   | 0                    | 3                  | 0.00%       |  | 105_0108          | 5                   | 0                    | 5                  | 0.00%       |
| 48_01B            | 3                   | 0                    | 3                  | 0.00%       |  | 106_cpx           | 10                  | 0                    | 10                 | 0.00%       |
| 49_cpx            | 1                   | 3                    | 4                  | 75.00%      |  | 107_01B           | 4                   | 0                    | 4                  | 0.00%       |
| 50_A1D            | 5                   | 0                    | 5                  | 0.00%       |  | 108_BC            | 5                   | 0                    | 5                  | 0.00%       |
| 51_01B            | 0                   | 0                    | 7                  | 0.00%       |  | 109_0107          | 3                   | 0                    | 3                  | 0.00%       |
| 52_01B            | 3                   | 0                    | 3                  | 0.00%       |  | 110_BC            | 3                   | 0                    | 3                  | 0.00%       |
| 53_01B            | 4                   | 0                    | 4                  | 0.00%       |  | 111_0108          | 4                   | 0                    | 4                  | 0.00%       |
| 54_01B            | 3                   | 0                    | 3                  | 0.00%       |  | 112_01B           | 0                   | 0                    | 4                  | 0.00%       |
| 55_01B            | 12                  | 0                    | 12                 | 0.00%       |  | 113_0107          | 4                   | 0                    | 4                  | 0.00%       |
| 56_cpx            | 4                   | 0                    | 4                  | 0.00%       |  | 114_0155          | 8                   | 0                    | 8                  | 0.00%       |
| 57_BC             | 7                   | 0                    | 7                  | 0.00%       |  | 115_01C           | 2                   | 0                    | 2                  | 0.00%       |
|                   |                     |                      |                    |             |  | 117_0107          | 7                   | 0                    | 7                  | 0.00%       |
|                   |                     |                      |                    |             |  | 118_BC            | 1                   | 0                    | 1                  | 0.00%       |
|                   |                     |                      |                    |             |  | Grand Total       | 3879                | 328                  | 4403               | 7.45%       |

1: Name of CRF, 2: Sequence numbers containing IN:M50

3: Sequence numbers containing IN:M50I, 4: Analyzed total sequence number

## Supplemental Table S5: Population analysis of RH:N79S in CRF

| CRFs <sup>1</sup> | RH:N79 <sup>2</sup> | RH:N79S <sup>3</sup> | Total <sup>4</sup> | % of RH:N79S | CRFs <sup>1</sup> | RH:N79 <sup>2</sup> | RH:N79S <sup>3</sup> | Total <sup>4</sup> | % of RH:N79S |
|-------------------|---------------------|----------------------|--------------------|--------------|-------------------|---------------------|----------------------|--------------------|--------------|
| 01_AE             | 1843                | 95                   | 1946               | 4.88%        | 56_cpx            | 0                   | 4                    | 4                  | 100.00%      |
| 02_AG             | 171                 | 6                    | 179                | 3.35%        | 57_BC             | 7                   | 0                    | 7                  | 0.00%        |
| 03_AB             | 1                   | 4                    | 5                  | 80.00%       | 58_01B            | 6                   | 0                    | 6                  | 0.00%        |
| 04_cpx            | 8                   | 0                    | 8                  | 0.00%        | 59_01B            | 8                   | 0                    | 8                  | 0.00%        |
| 05_DF             | 4                   | 0                    | 4                  | 0.00%        | 60_BC             | 6                   | 0                    | 6                  | 0.00%        |
| 06_cpx            | 15                  | 2                    | 17                 | 11.76%       | 61_BC             | 3                   | 0                    | 3                  | 0.00%        |
| 07_BC             | 400                 | 7                    | 411                | 1.70%        | 62_BC             | 3                   | 0                    | 3                  | 0.00%        |
| 08_BC             | 317                 | 8                    | 331                | 2.42%        | 63_02A            | 9                   | 4                    | 13                 | 30.77%       |
| 09_cpx            | 5                   | 0                    | 5                  | 0.00%        | 64_BC             | 8                   | 0                    | 8                  | 0.00%        |
| 10_CD             | 3                   | 0                    | 3                  | 0.00%        | 65_cpx            | 7                   | 0                    | 7                  | 0.00%        |
| 11_cpx            | 6                   | 18                   | 24                 | 75.00%       | 66_BF1            | 3                   | 0                    | 3                  | 0.00%        |
| 12_BF             | 12                  | 2                    | 15                 | 13.33%       | 67_01B            | 0                   | 2                    | 2                  | 100.00%      |
| 13_cpx            | 10                  | 0                    | 10                 | 0.00%        | 68_01B            | 4                   | 0                    | 4                  | 0.00%        |
| 14_BG             | 12                  | 0                    | 12                 | 0.00%        | 69_01B            | 0                   | 7                    | 7                  | 100.00%      |
| 15_01B            | 7                   | 1                    | 8                  | 12.50%       | 70_BF1            | 0                   | 3                    | 3                  | 100.00%      |
| 16_A2D            | 4                   | 0                    | 4                  | 0.00%        | 71_BF1            | 1                   | 13                   | 14                 | 92.86%       |
| 17_BF             | 7                   | 0                    | 7                  | 0.00%        | 72_BF1            | 5                   | 0                    | 5                  | 0.00%        |
| 18_cpx            | 8                   | 0                    | 8                  | 0.00%        | 73_BG             | 3                   | 0                    | 3                  | 0.00%        |
| 19_cpx            | 0                   | 5                    | 5                  | 100.00%      | 74_01B            | 3                   | 0                    | 3                  | 0.00%        |
| 20_BG             | 0                   | 5                    | 5                  | 100.00%      | 75_BF             | 3                   | 0                    | 3                  | 0.00%        |
| 21_A2D            | 3                   | 0                    | 3                  | 0.00%        | 76_01B            | 0                   | 2                    | 2                  | 100.00%      |
| 22_01A1           | 14                  | 0                    | 14                 | 0.00%        | 77_cpx            | 4                   | 0                    | 4                  | 0.00%        |
| 23_BG             | 0                   | 2                    | 2                  | 100.00%      | 78_cpx            | 3                   | 0                    | 3                  | 0.00%        |
| 24_BG             | 0                   | 9                    | 9                  | 100.00%      | 79_0107           | 3                   | 0                    | 3                  | 0.00%        |
| 25_cpx            | 3                   | 0                    | 3                  | 0.00%        | 80_0107           | 3                   | 0                    | 3                  | 0.00%        |
| 26_A5U            | 4                   | 0                    | 4                  | 0.00%        | 81_cpx            | 2                   | 0                    | 2                  | 0.00%        |
| 27_cpx            | 4                   | 0                    | 4                  | 0.00%        | 82_cpx            | 0                   | 6                    | 6                  | 100.00%      |
| 28_BF             | 0                   | 5                    | 5                  | 100.00%      | 83_cpx            | 0                   | 11                   | 11                 | 100.00%      |
| 29_BF             | 7                   | 1                    | 8                  | 12.50%       | 84_A1D            | 3                   | 0                    | 3                  | 0.00%        |
| 31_BC             | 3                   | 0                    | 3                  | 0.00%        | 85_BC             | 11                  | 0                    | 11                 | 0.00%        |
| 32_06A6           | 4                   | 0                    | 4                  | 0.00%        | 86_BC             | 0                   | 3                    | 3                  | 100.00%      |
| 33_01B            | 7                   | 0                    | 7                  | 0.00%        | 87_cpx            | 3                   | 0                    | 3                  | 0.00%        |
| 34_01B            | 3                   | 0                    | 3                  | 0.00%        | 88_BC             | 3                   | 0                    | 3                  | 0.00%        |
| 35_AD             | 21                  | 0                    | 22                 | 0.00%        | 89_BF             | 8                   | 0                    | 8                  | 0.00%        |
| 36_cpx            | 3                   | 0                    | 3                  | 0.00%        | 90_BF1            | 3                   | 6                    | 9                  | 66.67%       |
| 37_cpx            | 4                   | 0                    | 4                  | 0.00%        | 92_C2U            | 5                   | 0                    | 5                  | 0.00%        |
| 38_BF             | 1                   | 0                    | 1                  | 0.00%        | 93_cpx            | 3                   | 0                    | 3                  | 0.00%        |
| 39_BF             | 1                   | 2                    | 3                  | 66.67%       | 95_02B            | 3                   | 2                    | 5                  | 40.00%       |
| 40_BF             | 1                   | 3                    | 4                  | 75.00%       | 96_cpx            | 0                   | 3                    | 3                  | 100.00%      |
| 41_CD             | 3                   | 0                    | 3                  | 0.00%        | 97_01B            | 5                   | 0                    | 5                  | 0.00%        |
| 42_BF             | 17                  | 0                    | 17                 | 0.00%        | 98_06B            | 0                   | 1                    | 1                  | 100.00%      |
| 43_02G            | 3                   | 0                    | 3                  | 0.00%        | 99_BF             | 0                   | 3                    | 3                  | 100.00%      |
| 44_BF             | 3                   | 0                    | 3                  | 0.00%        | 100_01C           | 3                   | 0                    | 3                  | 0.00%        |
| 45_cpx            | 6                   | 0                    | 6                  | 0.00%        | 101_01B           | 3                   | 0                    | 3                  | 0.00%        |
| 46_BF             | 8                   | 0                    | 8                  | 0.00%        | 102_0107          | 2                   | 0                    | 2                  | 0.00%        |
| 47_BF             | 3                   | 0                    | 3                  | 0.00%        | 103_01B           | 0                   | 4                    | 4                  | 100.00%      |
| 48_01B            | 3                   | 0                    | 3                  | 0.00%        | 104_0107          | 3                   | 0                    | 3                  | 0.00%        |
| 49_cpx            | 3                   | 1                    | 4                  | 25.00%       | 105_0108          | 5                   | 0                    | 5                  | 0.00%        |
| 50_A1D            | 5                   | 0                    | 5                  | 0.00%        | 106_cpx           | 9                   | 0                    | 10                 | 0.00%        |
| 51_01B            | 7                   | 0                    | 7                  | 0.00%        | 107_01B           | 0                   | 4                    | 4                  | 100.00%      |
| 52_01B            | 3                   | 0                    | 3                  | 0.00%        | 108_BC            | 5                   | 0                    | 5                  | 0.00%        |
| 53_01B            | 4                   | 0                    | 4                  | 0.00%        | 109_0107          | 3                   | 0                    | 3                  | 0.00%        |
| 54_01B            | 0                   | 3                    | 3                  | 100.00%      | 110_BC            | 0                   | 3                    | 3                  | 100.00%      |
| 55_01B            | 12                  |                      | 12                 | 0.00%        | 111_0108          | 4                   | 0                    | 4                  | 0.00%        |
|                   |                     |                      |                    |              | 112_01B           | 4                   | 0                    | 4                  | 0.00%        |
|                   |                     |                      |                    |              | 113_0107          | 4                   | 0                    | 4                  | 0.00%        |
|                   |                     |                      |                    |              | 114_0155          | 8                   | 0                    | 8                  | 0.00%        |
|                   |                     |                      |                    |              | 115_01C           | 2                   | 0                    | 2                  | 0.00%        |
|                   |                     |                      |                    |              | 117_0107          | 7                   | 0                    | 7                  | 0.00%        |
|                   |                     |                      |                    |              | 118_BC            | 1                   | 0                    | 1                  | 0.00%        |
|                   |                     |                      |                    |              | Grand Total       | 3200                | 260                  | 3483               | 7.46%        |

1: Name of CRF, 2: Sequence numbers containing RH:N79

3: Sequence numbers containing RH:N79S, 4: Analyzed total sequence number

## Supplemental Table S6: Population analysis of IN:S17N in CRF

| CRFs <sup>1</sup> | IN:S17 <sup>2</sup> | IN:S17N <sup>3</sup> | Total <sup>4</sup> | % of IN:S17N | CRFs <sup>1</sup> | IN:S17 <sup>2</sup> | IN:S17N <sup>3</sup> | Total <sup>4</sup> | % of IN:S17N |
|-------------------|---------------------|----------------------|--------------------|--------------|-------------------|---------------------|----------------------|--------------------|--------------|
| 01_AE             | 2087                | 19                   | 2116               | 0.90%        | 58_01B            | 6                   | 0                    | 6                  | 0.00%        |
| 02_AG             | 559                 | 16                   | 592                | 2.70%        | 59_01B            | 8                   | 0                    | 8                  | 0.00%        |
| 03_AB             | 5                   | 0                    | 6                  | 0.00%        | 60_BC             | 6                   | 0                    | 6                  | 0.00%        |
| 04_cpx            | 2                   | 6                    | 8                  | 75.00%       | 61_BC             | 3                   | 0                    | 3                  | 0.00%        |
| 05_DF             | 3                   | 1                    | 4                  | 25.00%       | 62_BC             | 3                   | 0                    | 3                  | 0.00%        |
| 06_cpx            | 106                 | 23                   | 129                | 17.83%       | 63_02A            | 174                 | 0                    | 175                | 0.00%        |
| 07_BC             | 408                 | 3                    | 411                | 0.73%        | 64_BC             | 8                   | 0                    | 8                  | 0.00%        |
| 08_BC             | 322                 | 6                    | 331                | 1.81%        | 65_cpx            | 1                   | 6                    | 7                  | 85.71%       |
| 09_cpx            | 6                   | 0                    | 6                  | 0.00%        | 66_BF1            | 1                   | 0                    | 3                  | 0.00%        |
| 10_CD             | 1                   | 2                    | 3                  | 66.67%       | 67_01B            | 2                   | 0                    | 2                  | 0.00%        |
| 11_cpx            | 28                  | 1                    | 30                 | 3.33%        | 68_01B            | 3                   | 1                    | 4                  | 25.00%       |
| 12_BF             | 3                   | 13                   | 16                 | 81.25%       | 69_01B            | 7                   | 0                    | 7                  | 0.00%        |
| 13_cpx            | 19                  | 8                    | 27                 | 29.63%       | 70_BF1            | 3                   | 0                    | 3                  | 0.00%        |
| 14_BG             | 10                  | 4                    | 15                 | 26.67%       | 71_BF1            | 4                   | 6                    | 14                 | 42.86%       |
| 15_01B            | 8                   | 0                    | 8                  | 0.00%        | 72_BF1            | 1                   | 3                    | 5                  | 60.00%       |
| 16_A2D            | 4                   | 0                    | 4                  | 0.00%        | 73_BG             | 3                   | 0                    | 3                  | 0.00%        |
| 17_BF             |                     | 7                    | 7                  | 100.00%      | 74_01B            | 2                   | 1                    | 3                  | 33.33%       |
| 18_cpx            | 2                   | 8                    | 11                 | 72.73%       | 75_BF             |                     | 2                    | 3                  | 66.67%       |
| 19_cpx            | 3                   | 2                    | 6                  | 33.33%       | 76_01B            | 2                   | 0                    | 2                  | 0.00%        |
| 20_BG             | 5                   | 0                    | 5                  | 0.00%        | 77_cpx            | 4                   | 0                    | 4                  | 0.00%        |
| 21_A2D            | 3                   | 0                    | 3                  | 0.00%        | 78_cpx            | 3                   | 0                    | 3                  | 0.00%        |
| 22_01A1           | 26                  | 0                    | 27                 | 0.00%        | 79_0107           | 3                   | 0                    | 3                  | 0.00%        |
| 23_BG             | 2                   | 0                    | 2                  | 0.00%        | 80_0107           | 3                   | 0                    | 3                  | 0.00%        |
| 24_BG             | 8                   | 1                    | 9                  | 11.11%       | 81_cpx            | 1                   | 1                    | 2                  | 50.00%       |
| 25_cpx            | 5                   | 1                    | 6                  | 16.67%       | 82_cpx            | 6                   | 0                    | 6                  | 0.00%        |
| 26_A5U            | 4                   | 0                    | 4                  | 0.00%        | 83_cpx            | 11                  | 0                    | 11                 | 0.00%        |
| 27_cpx            | 1                   | 2                    | 4                  | 50.00%       | 84_A1D            | 3                   | 0                    | 3                  | 0.00%        |
| 28_BF             | 4                   | 1                    | 5                  | 20.00%       | 85_BC             | 10                  | 1                    | 11                 | 9.09%        |
| 29_BF             | 1                   | 5                    | 8                  | 62.50%       | 86_BC             |                     | 3                    | 3                  | 100.00%      |
| 31_BC             | 3                   | 0                    | 3                  | 0.00%        | 87_cpx            | 1                   | 2                    | 3                  | 66.67%       |
| 32_06A6           | 3                   | 1                    | 4                  | 25.00%       | 88_BC             | 3                   | 0                    | 3                  | 0.00%        |
| 33_01B            | 5                   | 1                    | 7                  | 14.29%       | 89_BF             | 6                   | 2                    | 8                  | 25.00%       |
| 34_01B            | 3                   | 0                    | 3                  | 0.00%        | 90_BF1            | 3                   | 5                    | 9                  | 55.56%       |
| 35_AD             | 22                  | 1                    | 23                 | 4.35%        | 92_C2U            | 2                   | 3                    | 5                  | 60.00%       |
| 36_cpx            | 4                   | 0                    | 4                  | 0.00%        | 93_cpx            |                     | 2                    | 3                  | 66.67%       |
| 37_cpx            | 12                  | 0                    | 13                 | 0.00%        | 95_02B            | 5                   | 0                    | 5                  | 0.00%        |
| 38_BF             | 1                   | 0                    | 1                  | 0.00%        | 96_cpx            |                     | 3                    | 3                  | 100.00%      |
| 39_BF             | 1                   | 2                    | 3                  | 66.67%       | 97_01B            | 5                   | 0                    | 5                  | 0.00%        |
| 40_BF             | 2                   | 2                    | 4                  | 50.00%       | 98_06B            | 1                   | 0                    | 1                  | 0.00%        |
| 41_CD             | 3                   | 0                    | 3                  | 0.00%        | 99_BF             | 2                   | 0                    | 3                  | 0.00%        |
| 42_BF             | 17                  | 0                    | 17                 | 0.00%        | 100_01C           | 3                   | 0                    | 3                  | 0.00%        |
| 43_02G            | 5                   | 0                    | 5                  | 0.00%        | 101_01B           | 3                   | 0                    | 3                  | 0.00%        |
| 44_BF             | 3                   | 0                    | 3                  | 0.00%        | 102_0107          |                     | 2                    | 2                  | 100.00%      |
| 45_cpx            | 8                   | 0                    | 8                  | 0.00%        | 103_01B           | 3                   | 1                    | 4                  | 25.00%       |
| 46_BF             | 1                   | 7                    | 8                  | 87.50%       | 104_0107          | 3                   | 0                    | 3                  | 0.00%        |
| 47_BF             |                     | 2                    | 3                  | 66.67%       | 105_0108          | 5                   | 0                    | 5                  | 0.00%        |
| 48_01B            | 3                   | 0                    | 3                  | 0.00%        | 106_cpx           | 10                  | 0                    | 10                 | 0.00%        |
| 49_cpx            | 4                   | 0                    | 4                  | 0.00%        | 107_01B           | 4                   | 0                    | 4                  | 0.00%        |
| 50_A1D            | 5                   | 0                    | 5                  | 0.00%        | 108_BC            | 2                   | 3                    | 5                  | 60.00%       |
| 51_01B            | 7                   | 0                    | 7                  | 0.00%        | 109_0107          | 3                   | 0                    | 3                  | 0.00%        |
| 52_01B            | 3                   | 0                    | 3                  | 0.00%        | 110_BC            | 3                   | 0                    | 3                  | 0.00%        |
| 53_01B            | 4                   | 0                    | 4                  | 0.00%        | 111_0108          | 4                   | 0                    | 4                  | 0.00%        |
| 54_01B            | 1                   | 1                    | 3                  | 33.33%       | 112_01B           |                     | 0                    | 4                  | 0.00%        |
| 55_01B            | 12                  | 0                    | 12                 | 0.00%        | 113_0107          | 4                   | 0                    | 4                  | 0.00%        |
| 56_cpx            | 4                   | 0                    | 4                  | 0.00%        | 114_0155          | 8                   | 0                    | 8                  | 0.00%        |
| 57_BC             | 6                   | 1                    | 7                  | 14.29%       | 115_01C           | 2                   | 0                    | 2                  | 0.00%        |
|                   |                     |                      |                    |              | 117_0107          | 7                   | 0                    | 7                  | 0.00%        |
|                   |                     |                      |                    |              | 118_BC            | 1                   | 0                    | 1                  | 0.00%        |
|                   |                     |                      |                    |              | Grand Total       | 4151                | 194                  | 4404               | 4.41%        |

1: Name of CRF, 2: Sequence numbers containing IN:S17

3: Sequence numbers containing IN:S17N, 4: Analyzed total sequence number

## Supplemental Table S7: Population analysis of RH:N79/IN:M50I in CRF

| <b>IN:M50/RH:N79</b> |                              |       |                      |                      |
|----------------------|------------------------------|-------|----------------------|----------------------|
| CRF <sup>1</sup>     | RH:N79S/IN:M50I <sup>2</sup> | Total | IN:M50I <sup>3</sup> | % of RH:N79S/IN:M50I |
| 01_AE                |                              | 1     | 77                   | 1.30%                |
| 02_AG                |                              | 0     | 17                   | 0.00%                |
| 06_cpx               |                              | 0     | 2                    | 0.00%                |
| 07_BC                |                              | 0     | 12                   | 0.00%                |
| 08_BC                |                              | 1     | 14                   | 7.14%                |
| 11_cpx               |                              | 5     | 6                    | 83.33%               |
| 13_cpx               |                              | 0     | 2                    | 0.00%                |
| 16_A2D               |                              | 0     | 2                    | 0.00%                |
| 22_01A1              |                              | 0     | 12                   | 0.00%                |
| 24_BG                |                              | 1     | 1                    | 100.00%              |
| 26_A5U               |                              | 0     | 3                    | 0.00%                |
| 27_cpx               |                              | 0     | 1                    | 0.00%                |
| 39_BF                |                              | 0     | 1                    | 0.00%                |
| 42_BF                |                              | 0     | 2                    | 0.00%                |
| 44_BF                |                              | 0     | 1                    | 0.00%                |
| 45_cpx               |                              | 0     | 1                    | 0.00%                |
| 49_cpx               |                              | 0     | 3                    | 0.00%                |
| 63_02A               |                              | 3     | 12                   | 25.00%               |
| 66_BF1               |                              | 0     | 1                    | 0.00%                |
| 71_BF1               |                              | 3     | 3                    | 100.00%              |
| 78_cpx               |                              | 0     | 1                    | 0.00%                |
| 90_BF1               |                              | 2     | 3                    | 66.67%               |
| Grand Total          |                              | 16    | 177                  | 9.04%                |

1: Name of CRF

2: Sequence numbers containing RH:N79S and IN:M50I.

3: Total analyzed sequence number containing IN:M50I with RH sequence

## Supplemental Table S8: Population analysis of IN:S17N/IN:M50I in CRF

| <b>IN:M50/IN:S17</b> |                             |                            |                   |  |
|----------------------|-----------------------------|----------------------------|-------------------|--|
| CRF <sup>1</sup>     | IN:17N/IN:M50I <sup>2</sup> | Total IN:M50I <sup>3</sup> | % of IN:N17S/M50I |  |
| 01_AE                | 0                           | 89                         | 0.00%             |  |
| 02_AG                | 1                           | 35                         | 2.86%             |  |
| 06_cpx               | 0                           | 7                          | 0.00%             |  |
| 07_BC                | 0                           | 12                         | 0.00%             |  |
| 08_BC                | 0                           | 14                         | 0.00%             |  |
| 11_cpx               | 1                           | 7                          | 14.29%            |  |
| 13_cpx               | 1                           | 2                          | 50.00%            |  |
| 16_A2D               | 0                           | 2                          | 0.00%             |  |
| 19_cpx               | 0                           | 1                          | 0.00%             |  |
| 22_01A1              | 0                           | 20                         | 0.00%             |  |
| 24_BG                | 0                           | 1                          | 0.00%             |  |
| 25_cpx               | 1                           | 1                          | 100.00%           |  |
| 26_A5U               | 0                           | 3                          | 0.00%             |  |
| 27_cpx               | 1                           | 1                          | 100.00%           |  |
| 39_BF                | 0                           | 1                          | 0.00%             |  |
| 42_BF                | 0                           | 2                          | 0.00%             |  |
| 44_BF                | 0                           | 1                          | 0.00%             |  |
| 45_cpx               | 0                           | 1                          | 0.00%             |  |
| 49_cpx               | 0                           | 3                          | 0.00%             |  |
| 63_02A               | 0                           | 116                        | 0.00%             |  |
| 66_BF1               | 0                           | 1                          | 0.00%             |  |
| 71_BF1               | 1                           | 3                          | 33.33%            |  |
| 78_cpx               | 0                           | 1                          | 0.00%             |  |
| 90_BF1               | 1                           | 3                          | 33.33%            |  |
| Grand Total          | 7                           | 327                        | 2.14%             |  |

1: Name of CRF

2: Sequence numbers containing IN:S17N and IN:M50I.

3: Total analyzed sequence number containing IN:M50I.

## Supplementary Table S9: Primer sequences for site-directed mutagenesis (Sense strands)

|             |                                                     |
|-------------|-----------------------------------------------------|
| RT:S322T    | 5'-GGAGTGTATTATGACCCAACAAAAGACTTAATAGCAGAA-3'       |
| RH:N79S     | 5'-GTGAATCAGAGTTAGTCAATCAAATAATAGAGCAGT-3'          |
| IN:S17N     | 5'-GAACATGAGAAATATCACAATAATTGGAGAGCAATGGCT-3        |
| IN:M50I     | 5'-CTAAAAGGGGAAGCCATACATGGACAAGTAGAC-3'             |
| G120:R252K  | 5'-CAATGTACACATGGAATCAAACCAGTAGTATCAACTCAACTG-3'    |
| G120:N448R  | 5'-GGACAAATTAGATGTTTCATCAAGGATTACTGGGCTGCTATTAAC-3' |
| G41:M24L    | 5'-AGCACTATGGGCTGCACGTCCTGACGCTGACGGTACAGGCC-3'     |
| G41:L254R   | 5'-GGAGCCTGTGCCGCTTCAGCTACCACCG-3'                  |
| G41:L340A   | 5'-CTAGAAGAATAAGACAGGGCGCGGAAAGGATTTTGCTA-3'        |
| G41:M24V    | 5'-ACTATGGGCGCAGCGTCGGTGACGCTGACGGTACAGGC-3'        |
| NF:L92R     | 5'-TTAGCCACTTTTTAAGAGAAAAGGGGGGACTGG-3'             |
| NF:E98D     | 5'-AAAAGGGGGGACTGGATGGGCTAATCACTCCCA-3'             |
| NF:V133I    | 5'-ACACACCAGGGCCAGGGATCAGATATCCACTGA-3'             |
| NF:Y143F    | 5'-GACCTTTGGATGGTGCTTCAAGCTAGTACCAGT-3'             |
| PR:D25N     | 5'-CAATTAAGGAAGCTCTATTAATAACAGGAGCAGATGATACAG-3'.   |
| IN:DCTD     | 5'-GTGATGATTGTGTGGCAAGTAGACAGTGATGAGGATTAACACATG-3' |
| IN: DIN     | 5'-GCTGGAATCAGGAAAGTACTATTTTAGATGGAATAGATAAGG-3'    |
| IN: D14aa   | 5'-CATCAGGGATTATGGATAAACAGATGGCAGGTG-3'             |
| IN:D288G    | 5'-GTGGCAAGTAGACAGGATGAGGGTTAACACATGGAAAAGATTAG-3'  |
| IN:M50V     | 5'-CTAAAAGGGGAAGCCGTGCATGGACAAGTAGAC-3'             |
| IN:M50R     | 5'-CTAAAAGGGGAAGCCAGGCATGGACAAGTAGAC-3'             |
| IN:M50L     | 5'-CTAAAAGGGGAAGCCCTGCATGGACAAGTAGAC-3'             |
| IN:M50T     | 5'-CTAAAAGGGGAAGCCACACATGGACAAGTAGAC-3'             |
| SITE7:FP>VP | 5'-CAGATTGGCTGCACTTTAAATGTTCCATTAGTCCTATTGAG-3'     |
